# Supplementary material
Source: PubMed Central journal article supplement (PMC4176945)
Supplement: NIHMS59131-supplement-Supplementary_figure_1.pdf [file NIHMS59131-supplement-Supplementary_figure_1.pdf]

**Supplementary Information for:**

**Structural basis of PAM recognition and target DNA unwinding by  
the CRISPR-associated endonuclease Cas9**

Carolin Anders<sup>1</sup>, Ole Niewöhner<sup>1</sup>, Alessia Dürst<sup>1</sup> & Martin Jinek<sup>1,†</sup>

<sup>1</sup>Department of Biochemistry, University of Zurich, Winterthurerstrasse 190,

CH-8057 Zurich, Switzerland

<sup>†</sup>Correspondence to: [jinek@bioc.uzh.ch](mailto:jinek@bioc.uzh.ch) (M.J.)

**Supplementary Figure 1 | Multiple sequence alignment of Cas9 orthologs.**

Primary sequences of type II-A Cas9 proteins from *Streptococcus pyogenes* (GI 15675041), *Listeria innocua* Clip 11262 (GI 16801805), *Streptococcus mutans* UA159 (GI 24379809), *Streptococcus thermophilus* LMD-9 (S.thermophilus A, GI 11662823; S.thermophilus B, GI 116627542), *Lactobacillus buchneri* NRRL B-30929 (GI 331702228), *Treponema denticola* ATCC 35405 (GI 42525843), *Francisella novicida* U112 (GI 118497352), *Campylobacter jejuni* subsp. *Jejuni* NCTC 11168 (GI 218563121), *Pasteurella multocida* subsp. *multocida* str. Pm70 (GI 218767588), *Neisseria meningitidis* Zs491 (GI 15602992) and *Actinomyces naeslundii* (GI 489880078) were aligned using MAFFT<sup>36</sup>. The alignment was generated in ESPript (<http://esprict.ibcp.fr/ESPript/>) using default settings. Strictly conserved residues are shown with white letters on red background. Residues with >70% similarity are shown in red and boxed in blue. The domain organization of SpyCas9 and secondary structure are shown above the sequences. Disordered segments of the polypeptide chain are indicated with dashed lines. RuvC domain catalytic residues are denoted with blue arrowheads. HNH domain active site residues are denoted with red arrowheads. PAM-interacting residues contacting the major groove are denoted with black arrowheads. The phosphate lock loop is marked with a red box. PIM; PAM interacting domain.

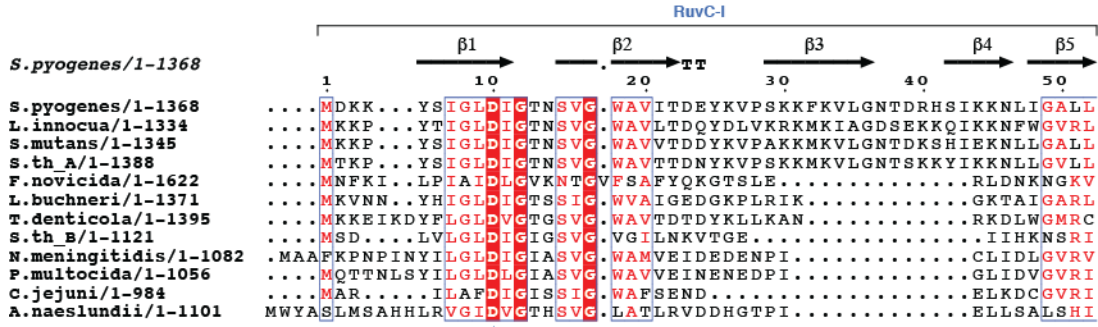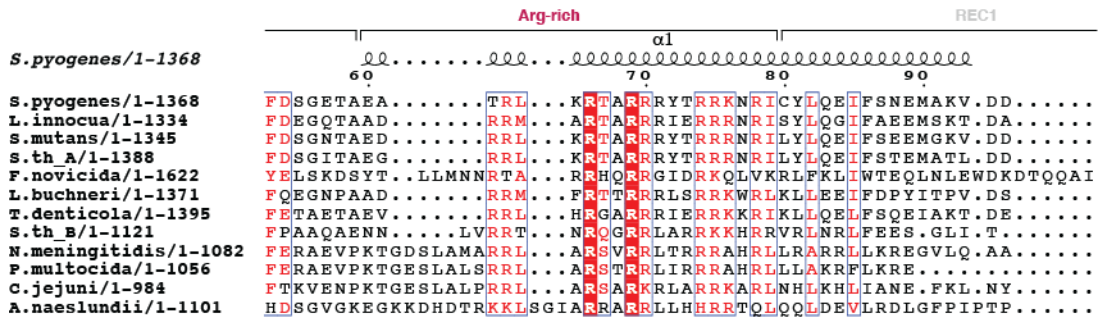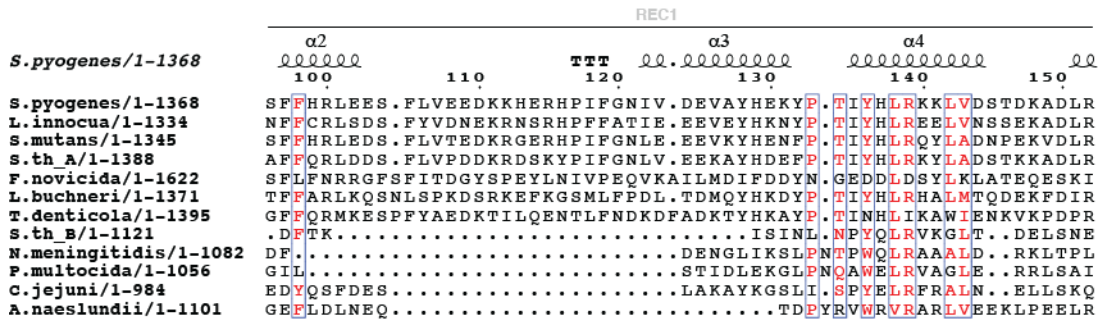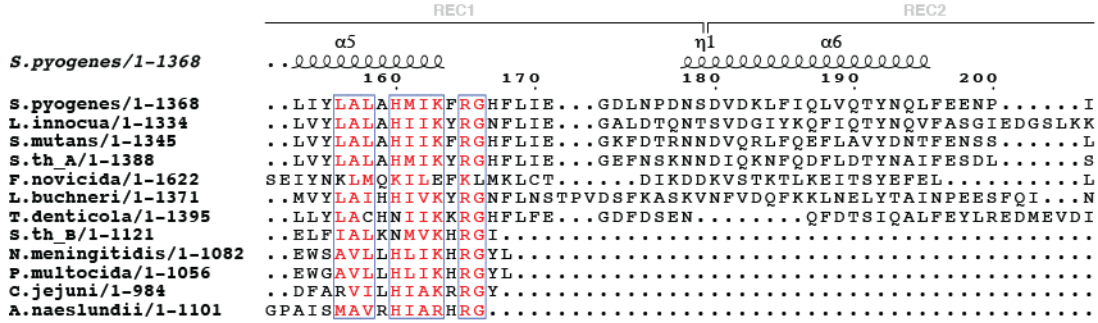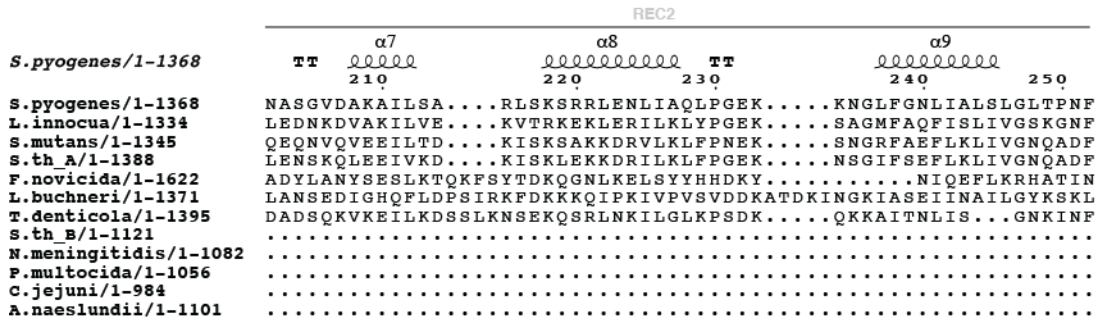

REC2

|                                | TT     | α10                 | η2           | α11      | α12                  |
|--------------------------------|--------|---------------------|--------------|----------|----------------------|
|                                | 260    | 270                 | 280          | 290      | 300                  |
| <i>S. pyogenes</i> /1-1368     | .....  | .....               | .....        | .....    | .....                |
| <i>S. pyogenes</i> /1-1368     | KSNFDL | ...AEDAKLQLSKDTY    | DDDLNLLAQ    | TGDQYAD  | FLAAKNLSDAILLSDILR   |
| <i>L. innocua</i> /1-1334      | QKPFDL | ...IEKSDIECAKDSY    | EEDLESLLAL   | TGDEYAE  | LFVAAKNAYSAVVLSIIT   |
| <i>S. mutans</i> /1-1345       | KKHFEL | ...EEKAPLQFSKDTY    | EELLEVLLAQ   | TGDNYAE  | LFLSAKKLYDSILLSGFLT  |
| <i>S. th A</i> /1-1388         | RKCFNL | ...DEKASLHFSKESY    | DEDLETLLGY   | TGDDYSV  | VLKAKKLYDAILLSGFLT   |
| <i>F. novicida</i> /1-1622     | DRILD  | TLLTDDLDIWNFNFEKDFD | DKNEEKLNQED  | EDDKDHIA | AHLHHFVFAVNNKIKSEMA. |
| <i>L. buchneri</i> /1-1371     | DVVVQC | TPVDSKSWALKFDEEDI   | DAKLQKILPEMD | ENQQS    | IIAILQNLYSQVTLNQIV.  |
| <i>T. denticola</i> /1-1395    | ADLYD  | NPDLKDAEKNSISFSKDDF | DALSDDLASL   | LGDSF    | ELLLKAKAVYNCVLSKVI.  |
| <i>S. th B</i> /1-1121         | .....  | .....               | .....        | .....    | .....                |
| <i>N. meningitidis</i> /1-1082 | .....  | .....               | .....        | .....    | .....                |
| <i>P. multocida</i> /1-1056    | .....  | .....               | .....        | .....    | .....                |
| <i>C. jejuni</i> /1-984        | .....  | .....               | .....        | .....    | .....                |
| <i>A. naeslundii</i> /1-1101   | .....  | .....               | .....        | .....    | .....                |

REC1

|                                | α13            | η3     | α14       |               |
|--------------------------------|----------------|--------|-----------|---------------|
|                                | 310            | 320    | 330       | 340           |
| <i>S. pyogenes</i> /1-1368     | .....          | .....  | .....     | .....         |
| <i>S. pyogenes</i> /1-1368     | VNTEITKAPLSASM | IKRVD  | DEHHQDLTL | LKALVLRQQLPEK |
| <i>L. innocua</i> /1-1334      | VAETETNAKLSASM | IERRD  | THEEDLGE  | LKAFIKLHLPKH  |
| <i>S. mutans</i> /1-1345       | VTDVGTKAPLSASM | IQRV   | NEHQMDLAQ | LKQFIRQLSDK   |
| <i>S. th A</i> /1-1388         | VTDNETEAPLSASM | IKRVD  | NEHKEDLAL | LKKEYIRNLSLKT |
| <i>F. novicida</i> /1-1622     | SGGRHRSQYFQ    | EITNVL | DENNHQEGY | LKNFCENLHNKK  |
| <i>L. buchneri</i> /1-1371     | .....          | .....  | .....     | .....         |
| <i>T. denticola</i> /1-1395    | .....          | .....  | .....     | .....         |
| <i>S. th B</i> /1-1121         | .....          | .....  | .....     | .....         |
| <i>N. meningitidis</i> /1-1082 | .....          | .....  | .....     | .....         |
| <i>P. multocida</i> /1-1056    | .....          | .....  | .....     | .....         |
| <i>C. jejuni</i> /1-984        | .....          | .....  | .....     | .....         |
| <i>A. naeslundii</i> /1-1101   | .....          | .....  | .....     | .....         |

REC1

|                                | α15   | α16   | α17          |                                 |
|--------------------------------|-------|-------|--------------|---------------------------------|
|                                | 370   | 380   | 390          | 400                             |
| <i>S. pyogenes</i> /1-1368     | ..... | ..... | .....        | .....                           |
| <i>S. pyogenes</i> /1-1368     | ..... | IDGGA | SQEFYKFIKPI  | L...EKMDGTEELLVKLNREDLLRKRQTFDN |
| <i>L. innocua</i> /1-1334      | ..... | IDGKT | KQADFYKMKMTL | ...ENIEGADYFIAKIEKENFLRKRQTFDN  |
| <i>S. mutans</i> /1-1345       | ..... | IDGKT | NQEFYKYLKGLL | ...NKIEGSGYFLDKIEREDFLRKRQTFDN  |
| <i>S. th A</i> /1-1388         | ..... | IDGKT | NQEDFYVYLKLL | ...AEFEGADYFLEKIDREDFLRKRQTFDN  |
| <i>F. novicida</i> /1-1622     | ..... | ..... | .....        | .....                           |
| <i>L. buchneri</i> /1-1371     | ..... | ..... | .....        | .....                           |
| <i>T. denticola</i> /1-1395    | ..... | ..... | .....        | .....                           |
| <i>S. th B</i> /1-1121         | ..... | ..... | .....        | .....                           |
| <i>N. meningitidis</i> /1-1082 | ..... | ..... | .....        | .....                           |
| <i>P. multocida</i> /1-1056    | ..... | ..... | .....        | .....                           |
| <i>C. jejuni</i> /1-984        | ..... | ..... | .....        | .....                           |
| <i>A. naeslundii</i> /1-1101   | ..... | ..... | .....        | .....                           |

REC1

|                                | η4    | α18   | α19      | α20                                 |
|--------------------------------|-------|-------|----------|-------------------------------------|
|                                | 410   | 420   | 430      | 440                                 |
| <i>S. pyogenes</i> /1-1368     | ..... | ..... | .....    | .....                               |
| <i>S. pyogenes</i> /1-1368     | GSIPH | QIHLG | ELHAILRR | QEDF.Y...PFLKD...NRE...KIEKILT      |
| <i>L. innocua</i> /1-1334      | GAIPH | QLHLE | LEAILHQ  | QAKY.Y...PFLKE...NYD...KIKSLVT      |
| <i>S. mutans</i> /1-1345       | GSIPH | QIHLQ | EMRAILRR | QAEF.Y...PFLAD...NQD...RIEKLIT      |
| <i>S. th A</i> /1-1388         | GSIPY | QIHLQ | EMRAILDR | QAKF.Y...PFLAK...NKE...RIEKLIT      |
| <i>F. novicida</i> /1-1622     | AKYSY | KDLCN | ELKQKVT  | KAGLVDFLLELDP CRTIP                 |
| <i>L. buchneri</i> /1-1371     | GVIPH | QLHQR | ELDEIEH  | QSKY.Y...PWLAEINPNKHLHLAKYKIEELVA   |
| <i>T. denticola</i> /1-1395    | AEPY  | QLRKM | LEKILSNA | EKKH.F...SFLKQKDEKGLSHSE...KIIIMLLT |
| <i>S. th B</i> /1-1121         | NVPPT | SAYRS | ELALRIL  | QQTQ.F.N...PQITD...EFINRYLELIT      |
| <i>N. meningitidis</i> /1-1082 | ..... | ..... | .....    | .....                               |
| <i>P. multocida</i> /1-1056    | ..... | ..... | .....    | .....                               |
| <i>C. jejuni</i> /1-984        | ..... | ..... | .....    | .....                               |
| <i>A. naeslundii</i> /1-1101   | ..... | ..... | .....    | .....                               |

REC1

|                                | α21       |
|--------------------------------|-----------|
|                                | 450       |
| <i>S. pyogenes</i> /1-1368     | .....     |
| <i>S. pyogenes</i> /1-1368     | FRIPY     |
| <i>L. innocua</i> /1-1334      | FRIPY     |
| <i>S. mutans</i> /1-1345       | FRIPY     |
| <i>S. th A</i> /1-1388         | FRIPY     |
| <i>F. novicida</i> /1-1622     | LDNQYPNWQ |
| <i>L. buchneri</i> /1-1371     | FRVPY     |
| <i>T. denticola</i> /1-1395    | FKIPY     |
| <i>S. th B</i> /1-1121         | GKRKY     |
| <i>N. meningitidis</i> /1-1082 | TQRP      |
| <i>P. multocida</i> /1-1056    | WQKPA     |
| <i>C. jejuni</i> /1-984        | YKRAL     |
| <i>A. naeslundii</i> /1-1101   | FKADS     |

REC1

*S. pyogenes*/1-1368

*S. pyogenes*/1-1368  
*L. innocua*/1-1334  
*S. mutans*/1-1345  
*S. th A*/1-1388  
*F. novicida*/1-1622  
*L. buchneri*/1-1371  
*T. denticola*/1-1395  
*S. th B*/1-1121  
*N. meningitidis*/1-1082  
*P. multocida*/1-1056  
*C. jejuni*/1-984  
*A. naeslundii*/1-1101

REC1

*S. pyogenes*/1-1368

*S. pyogenes*/1-1368  
*L. innocua*/1-1334  
*S. mutans*/1-1345  
*S. th A*/1-1388  
*F. novicida*/1-1622  
*L. buchneri*/1-1371  
*T. denticola*/1-1395  
*S. th B*/1-1121  
*N. meningitidis*/1-1082  
*P. multocida*/1-1056  
*C. jejuni*/1-984  
*A. naeslundii*/1-1101

REC1

*S. pyogenes*/1-1368

*S. pyogenes*/1-1368  
*L. innocua*/1-1334  
*S. mutans*/1-1345  
*S. th A*/1-1388  
*F. novicida*/1-1622  
*L. buchneri*/1-1371  
*T. denticola*/1-1395  
*S. th B*/1-1121  
*N. meningitidis*/1-1082  
*P. multocida*/1-1056  
*C. jejuni*/1-984  
*A. naeslundii*/1-1101

REC1

*S. pyogenes*/1-1368

*S. pyogenes*/1-1368  
*L. innocua*/1-1334  
*S. mutans*/1-1345  
*S. th A*/1-1388  
*F. novicida*/1-1622  
*L. buchneri*/1-1371  
*T. denticola*/1-1395  
*S. th B*/1-1121  
*N. meningitidis*/1-1082  
*P. multocida*/1-1056  
*C. jejuni*/1-984  
*A. naeslundii*/1-1101

REC1

*S. pyogenes*/1-1368

*S. pyogenes*/1-1368  
*L. innocua*/1-1334  
*S. mutans*/1-1345  
*S. th A*/1-1388  
*F. novicida*/1-1622  
*L. buchneri*/1-1371  
*T. denticola*/1-1395  
*S. th B*/1-1121  
*N. meningitidis*/1-1082  
*P. multocida*/1-1056  
*C. jejuni*/1-984  
*A. naeslundii*/1-1101

RuvC-II

*S. pyogenes*/1-1368

α36 α37 β9

720 730 740 750 760

*S. pyogenes*/1-1368  
*L. innocua*/1-1334  
*S. mutans*/1-1345  
*S. th\_A*/1-1388  
*F. novicida*/1-1622  
*L. buchneri*/1-1371  
*T. denticola*/1-1395  
*S. th\_B*/1-1121  
*N. meningitidis*/1-1082  
*F. multocida*/1-1056  
*C. jejuni*/1-984  
*A. naeslundii*/1-1101

RuvC-II HNH HNH

α38 η7 η8

770 780 790 800

*S. pyogenes*/1-1368

*S. pyogenes*/1-1368  
*L. innocua*/1-1334  
*S. mutans*/1-1345  
*S. th\_A*/1-1388  
*F. novicida*/1-1622  
*L. buchneri*/1-1371  
*T. denticola*/1-1395  
*S. th\_B*/1-1121  
*N. meningitidis*/1-1082  
*F. multocida*/1-1056  
*C. jejuni*/1-984  
*A. naeslundii*/1-1101

HNH

α39 β10 η9 β11

810 820 830 840 850 860

*S. pyogenes*/1-1368

*S. pyogenes*/1-1368  
*L. innocua*/1-1334  
*S. mutans*/1-1345  
*S. th\_A*/1-1388  
*F. novicida*/1-1622  
*L. buchneri*/1-1371  
*T. denticola*/1-1395  
*S. th\_B*/1-1121  
*N. meningitidis*/1-1082  
*F. multocida*/1-1056  
*C. jejuni*/1-984  
*A. naeslundii*/1-1101

HNH

η10 α40 α41

870 880 890

*S. pyogenes*/1-1368

*S. pyogenes*/1-1368  
*L. innocua*/1-1334  
*S. mutans*/1-1345  
*S. th\_A*/1-1388  
*F. novicida*/1-1622  
*L. buchneri*/1-1371  
*T. denticola*/1-1395  
*S. th\_B*/1-1121  
*N. meningitidis*/1-1082  
*F. multocida*/1-1056  
*C. jejuni*/1-984  
*A. naeslundii*/1-1101

HNH RuvC-III

η11 α42 α43 β12

900 910 920 930 940

*S. pyogenes*/1-1368

*S. pyogenes*/1-1368  
*L. innocua*/1-1334  
*S. mutans*/1-1345  
*S. th\_A*/1-1388  
*F. novicida*/1-1622  
*L. buchneri*/1-1371  
*T. denticola*/1-1395  
*S. th\_B*/1-1121  
*N. meningitidis*/1-1082  
*F. multocida*/1-1056  
*C. jejuni*/1-984  
*A. naeslundii*/1-1101



PIM (Topo) PIM (CTD)

α51 β20 η14 β21 β22 TT

.....00 → 1190 1200 → 1210

*S. pyogenes*/1-1368  
*S. pyogenes*/1-1368  
*L. innocua*/1-1334  
*S. mutans*/1-1345  
*S. th A*/1-1388  
*F. novicida*/1-1622  
*L. buchneri*/1-1371  
*T. denticola*/1-1395  
*S. th B*/1-1121  
*N. meningitidis*/1-1082  
*P. multocida*/1-1056  
*C. jejuni*/1-984  
*A. naeslundii*/1-1101

PIM (CTD)

β23 β24 α52 α53

→ 1220 → 1230 0000000000 1240 1250 00000000

*S. pyogenes*/1-1368  
*S. pyogenes*/1-1368  
*L. innocua*/1-1334  
*S. mutans*/1-1345  
*S. th A*/1-1388  
*F. novicida*/1-1622  
*L. buchneri*/1-1371  
*T. denticola*/1-1395  
*S. th B*/1-1121  
*N. meningitidis*/1-1082  
*P. multocida*/1-1056  
*C. jejuni*/1-984  
*A. naeslundii*/1-1101

PIM (CTD)

α54 α55

.....00 0000000000.....00 000.....0000000000 1300 000000

1270 1280 1290 1300

*S. pyogenes*/1-1368  
*S. pyogenes*/1-1368  
*L. innocua*/1-1334  
*S. mutans*/1-1345  
*S. th A*/1-1388  
*F. novicida*/1-1622  
*L. buchneri*/1-1371  
*T. denticola*/1-1395  
*S. th B*/1-1121  
*N. meningitidis*/1-1082  
*P. multocida*/1-1056  
*C. jejuni*/1-984  
*A. naeslundii*/1-1101

PIM (CTD)

α56 η15 β25 β26 major groove η16

000.....000000 1310 1320 → 1330 → 1340 00.0

*S. pyogenes*/1-1368  
*S. pyogenes*/1-1368  
*L. innocua*/1-1334  
*S. mutans*/1-1345  
*S. th A*/1-1388  
*F. novicida*/1-1622  
*L. buchneri*/1-1371  
*T. denticola*/1-1395  
*S. th B*/1-1121  
*N. meningitidis*/1-1082  
*P. multocida*/1-1056  
*C. jejuni*/1-984  
*A. naeslundii*/1-1101

PIM (CTD)

β27 β28

→ 1350 → 1360

*S. pyogenes*/1-1368  
*S. pyogenes*/1-1368  
*L. innocua*/1-1334  
*S. mutans*/1-1345  
*S. th A*/1-1388  
*F. novicida*/1-1622  
*L. buchneri*/1-1371  
*T. denticola*/1-1395  
*S. th B*/1-1121  
*N. meningitidis*/1-1082  
*P. multocida*/1-1056  
*C. jejuni*/1-984  
*A. naeslundii*/1-1101
